# Supplementary material for: Smooth heuristic optimization on a complex chemical subspace
Source: Royal Society of Chemistry journal article supplement (doi:10.1039/c5cp02177d), 2015-01-01
Supplement: c5cp02177d1.pdf [file c5cp02177d1.pdf]

## Supplementary Material

Jennifer M. Elward and B. Christopher Rinderspacher\*

E-mail: [berend.c.rinderspacher.civ@mail.mil](mailto:berend.c.rinderspacher.civ@mail.mil)

---

\*To whom correspondence should be addressed

# Enumeration Convention

The compound  $\{x_i = X_i\}_{i=1}^8$  is assigned the number,

$$n(x) = \sum_{i=1}^M X_i \prod_{j=0}^{i-1} N_j. \quad (1)$$

Where  $N_j$  is the number of options on substitution site  $j$ , and  $N_0 = 1$ . The naming scheme was chosen to reflect a general base numbering system. The choice of general base was made so as to directly relate the framework substitution options to the enumerated compound. The numbering for each substituent is shown in 1.

Table 1: Substituent numbering for general base enumeration scheme.

| <b>Substituent</b> | <b>Number</b> |
|--------------------|---------------|
| H                  | 0             |
| F                  | 1             |
| Br                 | 2             |
| Cl                 | 3             |

An explicit example of the enumeration scheme used in this work is given here. Structure 9004, in 1 is evaluated.  $X_1, X_4, X_6$  and  $X_8$  all contribute 0 due to their hydrogen substi-

Table 2: Substituent evaluation for structure 9004.

| <b>Site</b> | <b>Substituent</b> | <b>Numerical Value</b> | <b>Sum Contribution</b> |
|-------------|--------------------|------------------------|-------------------------|
| $X_1$       | H                  | 0                      | 0                       |
| $X_2$       | Br                 | 3                      | $3 \times 4$            |
| $X_3$       | Cl                 | 2                      | $2 \times 4^2$          |
| $X_4$       | H                  | 0                      | 0                       |
| $X_5$       | Br                 | 3                      | $3 \times 4^4$          |
| $X_6$       | H                  | 0                      | 0                       |
| $X_7$       | Cl                 | 2                      | $2 \times 4^6$          |
| $X_8$       | H                  | 0                      | 0                       |

tion. Site  $X_2$  has numerical value 3 for it's bromine substitution. The value for  $X_2$  is then multiplied by the number of substitution options for site 2, which is four in total giving a total contribution from site 2 of  $3 \times (4options) = 12$ . The process is repeated for the

remaining sites, each of which are shown in 2. Summing up all contributions from column 4 leads to an enumerated value of 9004.

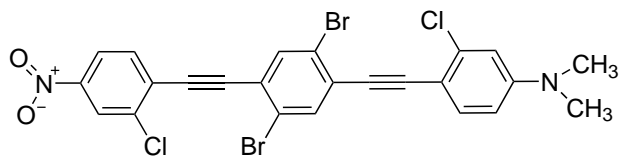

Figure 1: Enumerated structure 9004.

# Final Structure Images

Below are 22 unique final structure images for each of the tested algorithms. The structures are given in terms of their respective starting points. Within each of those plots the chemical graphs for each of the structures are organized by structure number. The structures resulting from starting point zero are given in 2, starting point 4710 in 3, starting point 8389 in 4, starting point 41329 in 5 and finally starting point 41668 in 6.

Starting Point 0

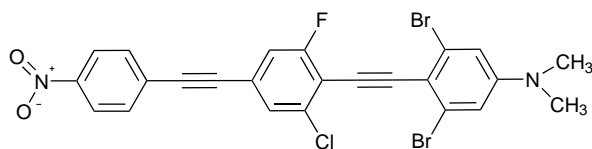

Structure 246:GBLS, GBGLS1, GBGLS2, GBGLS3

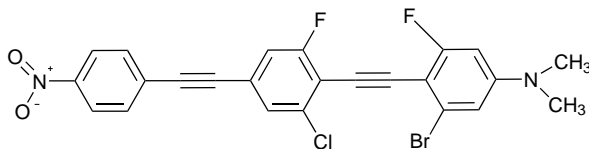

Structure 214: GBGLS0

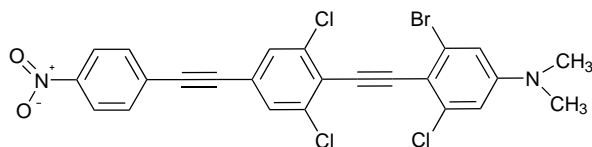

Structure 186: GBGLS4

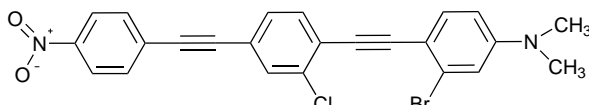

Structure 194: GBGLS3'

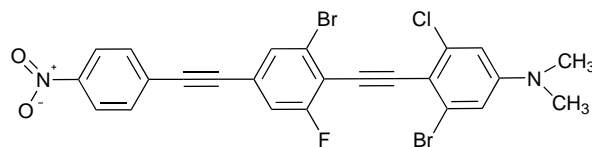

Structure 183: BLS

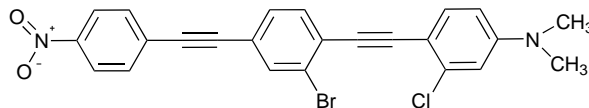

Structure 131: BLSP

Figure 2: Collected final structures resulting from starting point 0, organized by structure number.

Starting Point 4710

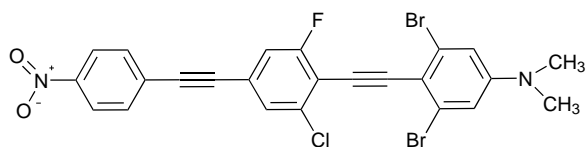

Structure 249: GBLS, GBGLS1, GBGLS2, GBGLS3, GBGLS4, GBGLS3'

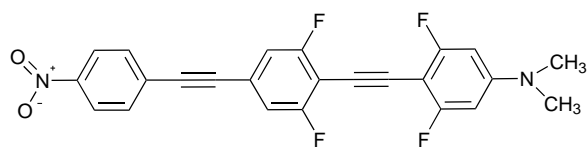

Structure 85: GBGLS0

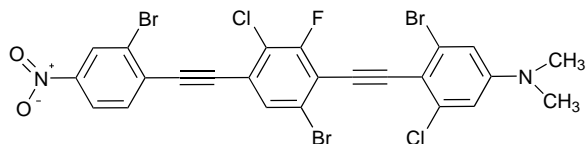

Structure 13037: BLS

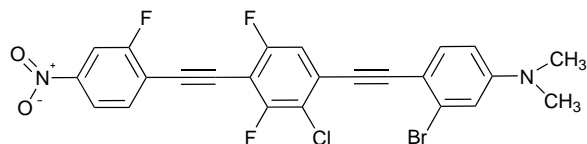

Structure 12821: BLSP

Figure 3: Collected final structures resulting from starting point 4710, organized by structure number.

Starting Point 8389

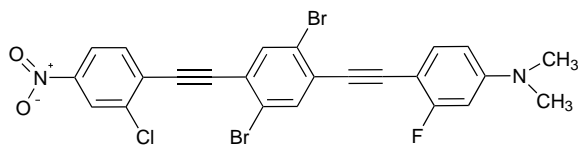

Structure 9080: GBLS, BLS

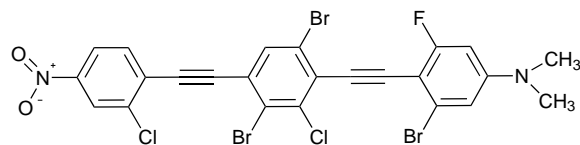

Structure 9182: GBGLS0

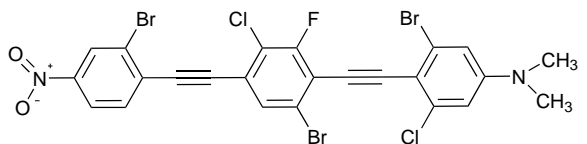

Structure 13037: GBGLS1, GBGLS2, GBGLS3

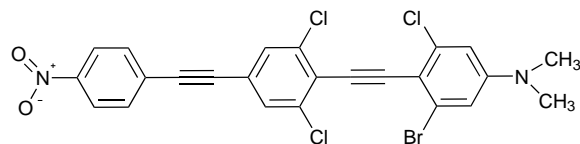

Structure 234: GBGLS4

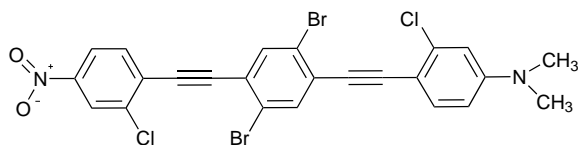

Structure 9004: GBGLS3'

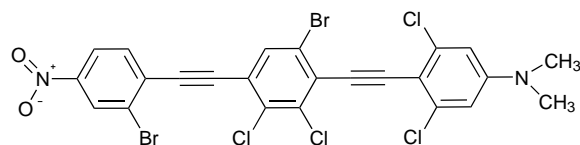

Structure 12974: BLSP

Figure 4: Collected final structures resulting from starting point 8389, organized by structure number.

Starting Point 41329

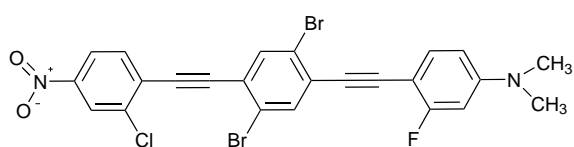

Structure 9080: GBLS

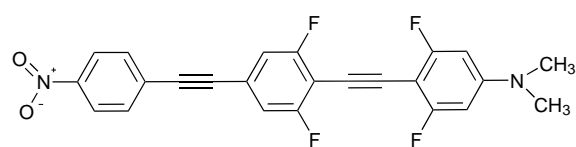

Structure 85: GBGLS0

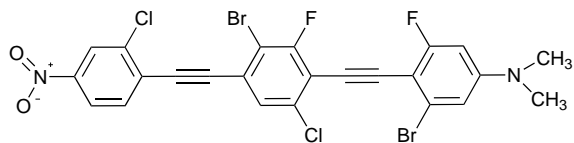

Structure 9081: GBGLS1, GBGLS2, GBGLS3, GBGLS4

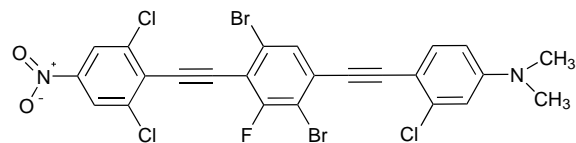

Structure 9133: GBGLS3'

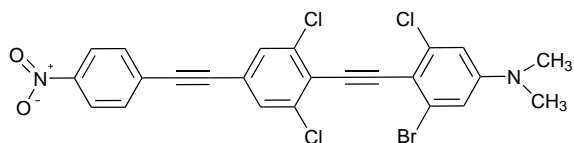

Structure 237: BLS

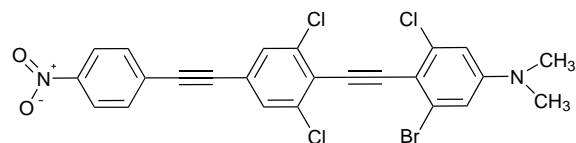

Structure 234: BLSP

Figure 5: Collected final structures resulting from starting point 41329, organized by structure number.

Starting Point 41668

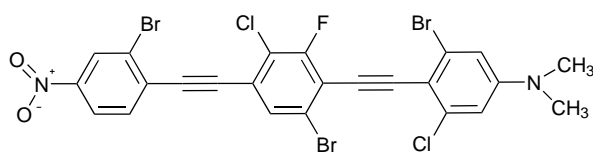

Structure 13037: GBLS, GBGLS1, GBGLS3

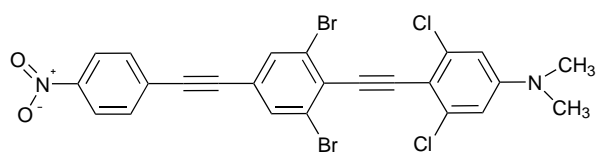

Structure 175: GBGLS0

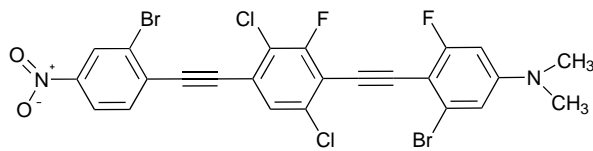

Structure 12921: GBGLS2, GBGLS4

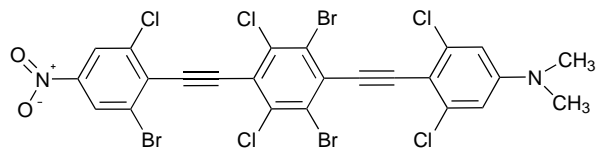

Structure 45034: GBGLS3'

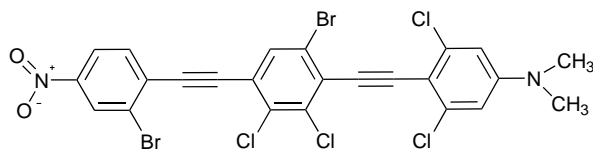

Structure 12974: BLS

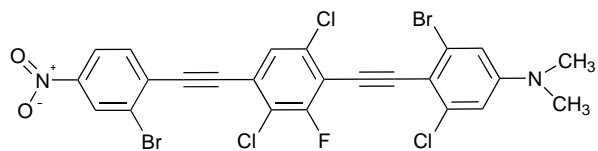

Structure 12985: BLSP

Figure 6: Collected final structures resulting from starting point 41668, organized by structure number.

## Algorithmic Paths

In this section, all algorithmic paths are given for each algorithm and starting point. For all of the plots given here, the hyperpolarizability ( $\beta$ ) is given on the x-axis and the absorbance metric ( $\eta$ ) is given on the y-axis. The green circles signify the start of the path and the red circle signifies the end of the path. The blue triangles denote  $\lambda$  parameter changes, and the yellow squares are optimization improvement points.



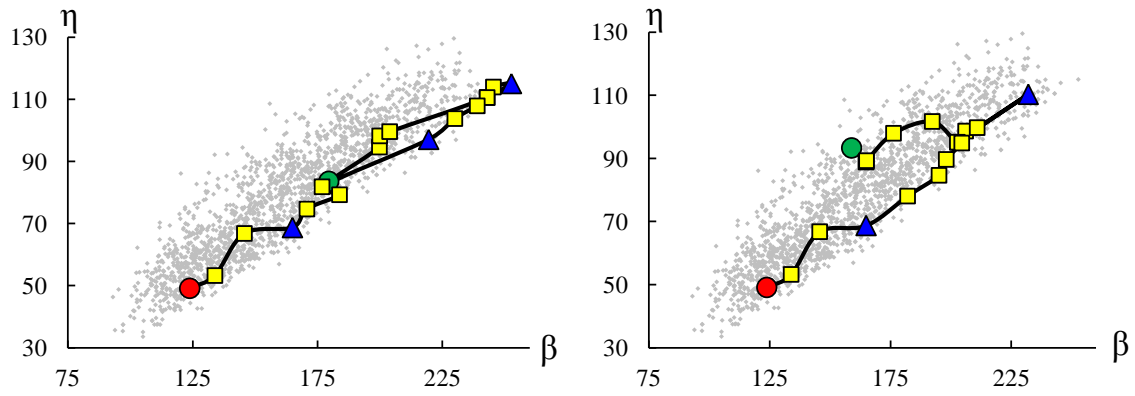

(a) Starting point 0, ending structure 246.

(b) Starting point 4710, ending structure 249.

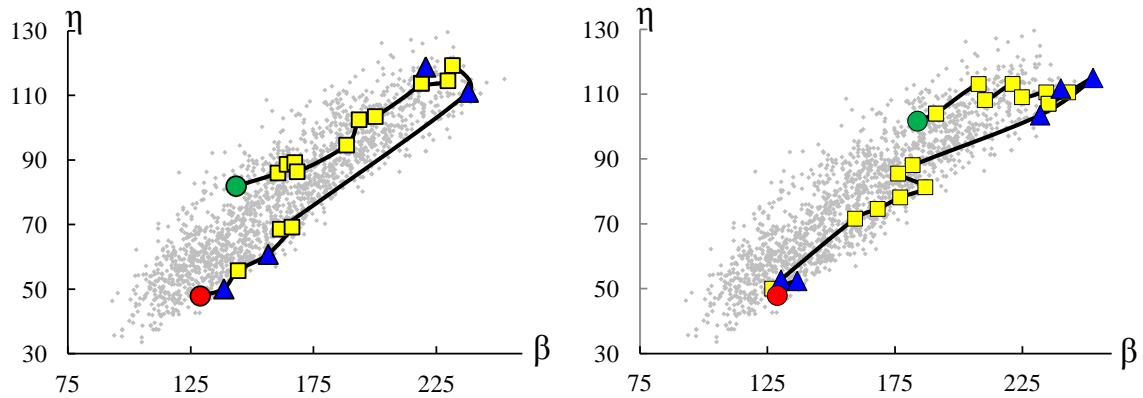

(c) Starting point 8389, ending structure 9080.

(d) Starting point 41329, ending structure 9080.

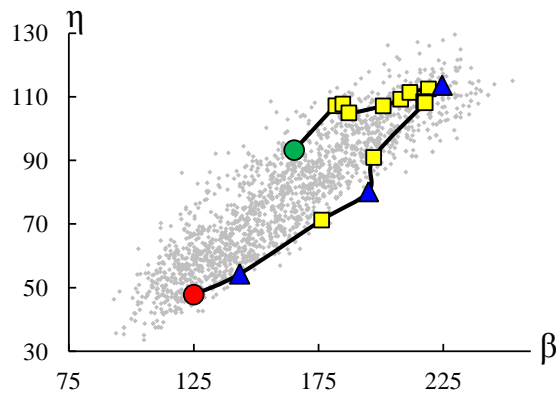

(e) Starting point 41668, ending structure 13037.

Figure 7: Paths resulting from GBLs algorithm.

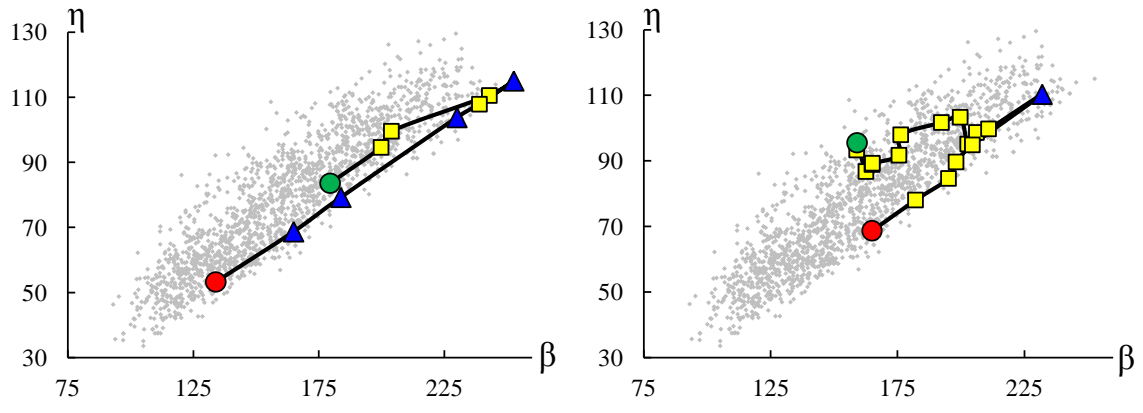

(a) Starting point 0, ending structure 214.

(b) Starting point 4710, ending structure 85.

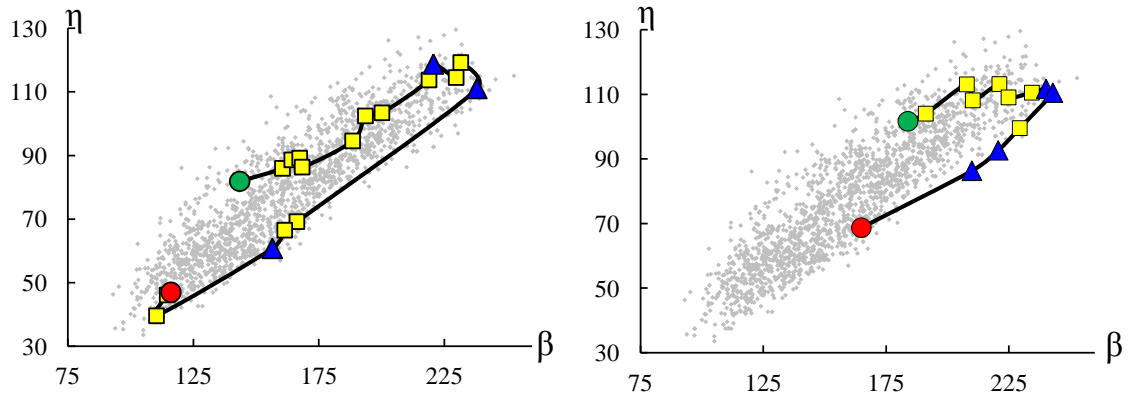

(c) Starting point 8389, ending structure 9182.

(d) Starting point 41329, ending structure 85.

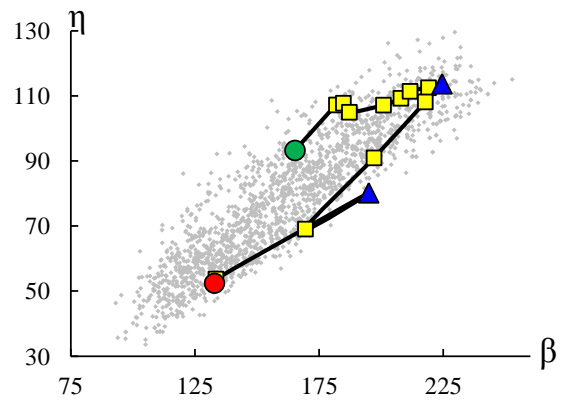

(e) Starting point 41668, ending structure 175.

Figure 8: Paths resulting from GBGLS0 algorithm.



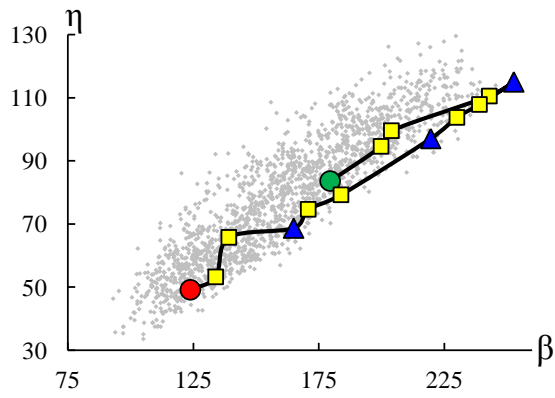

(a) Starting point 0, ending structure 246.

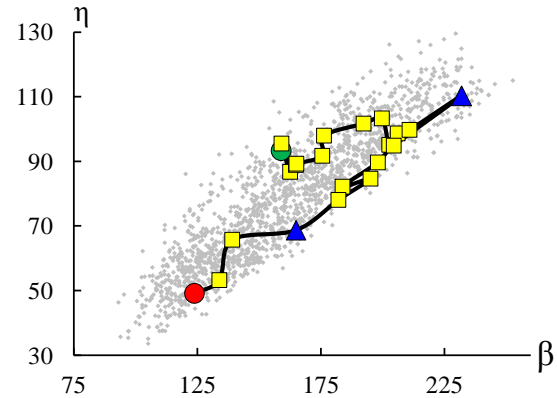

(b) Starting point 4710, ending structure 249.

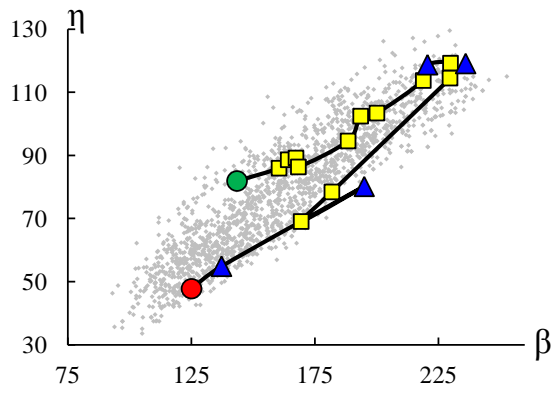

(c) Starting point 8389, ending structure 13037.

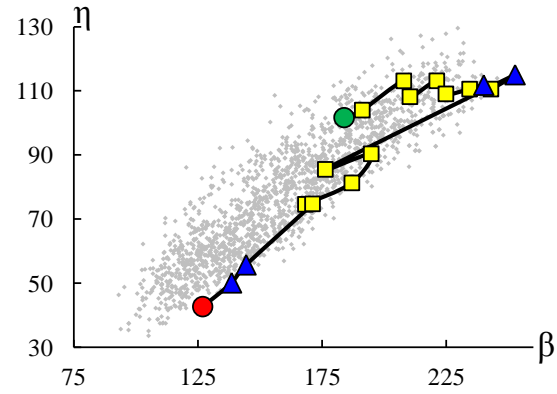

(d) Starting point 41329, ending structure 9081.

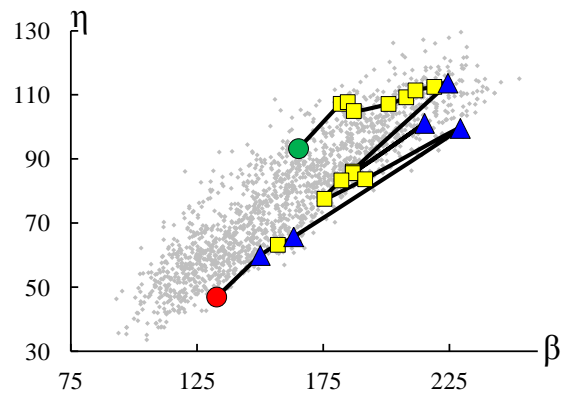

(e) Starting point 41668, ending structure 12921.

Figure 10: Paths resulting from GBGLS2 algorithm.

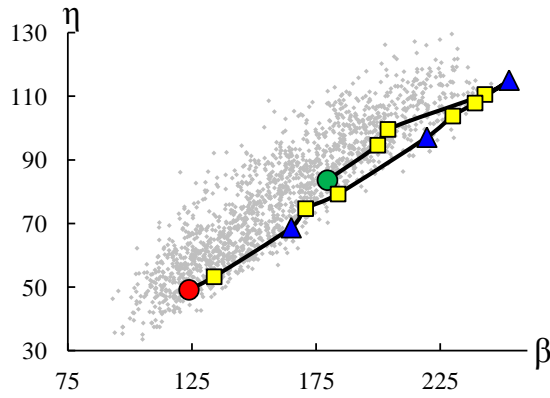

(a) Starting point 0, ending structure 246.

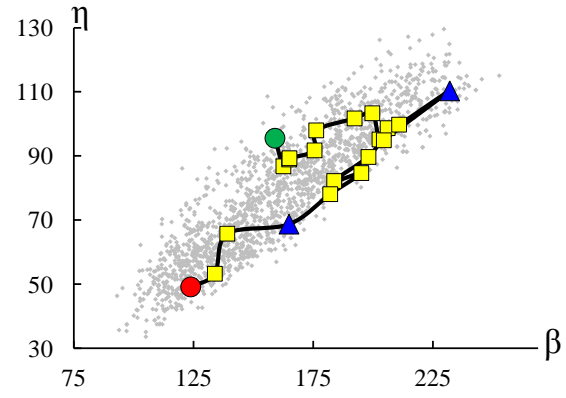

(b) Starting point 4710, ending structure 249.

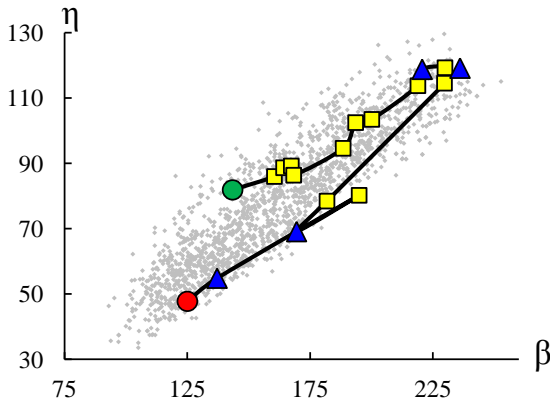

(c) Starting point 8389, ending structure 13037.

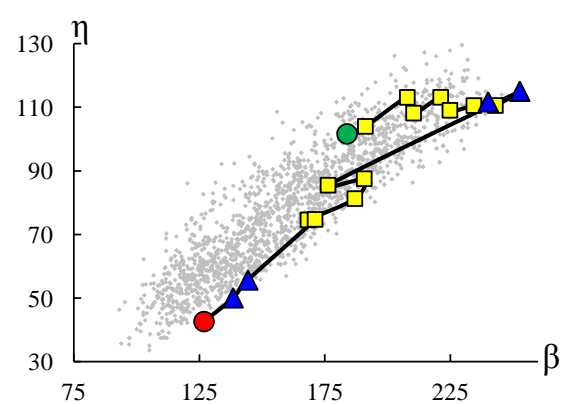

(d) Starting point 41329, ending structure 9081.

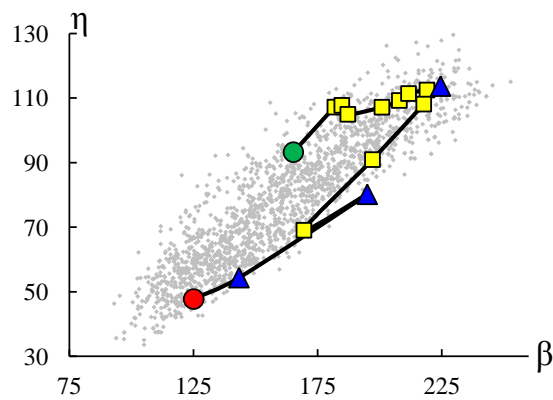

(e) Starting point 41668, ending structure 13037.

Figure 11: Paths resulting from GBGLS3 algorithm.

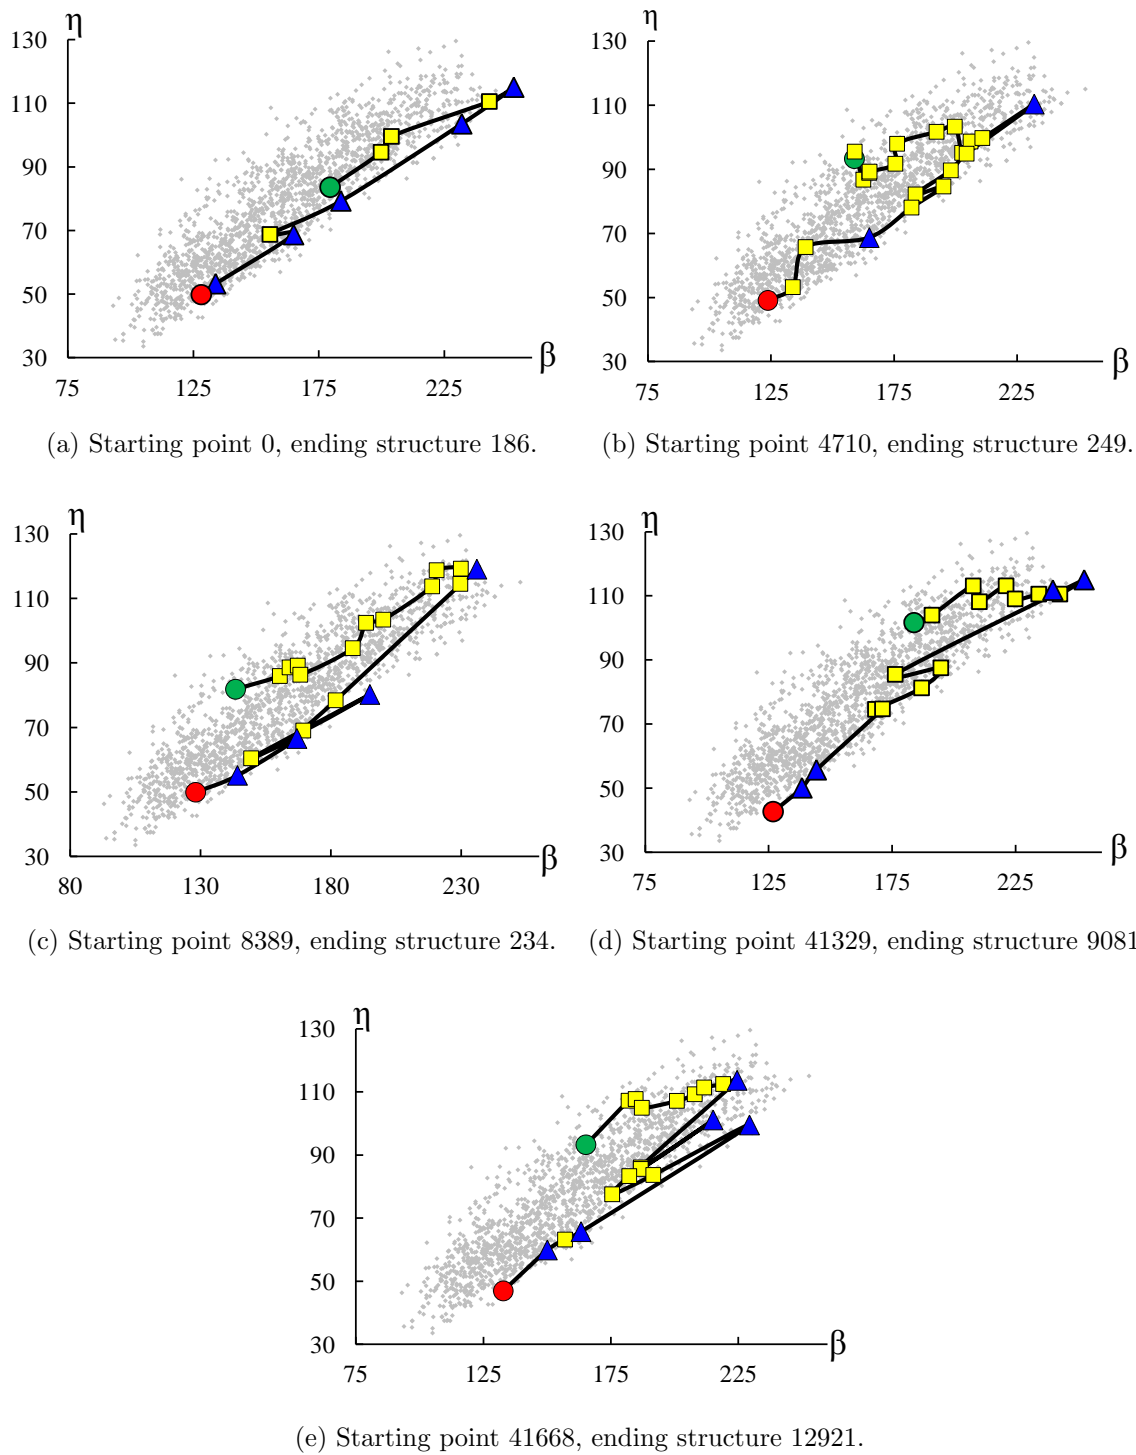

Figure 12: Paths resulting from GBGLS4 algorithm.

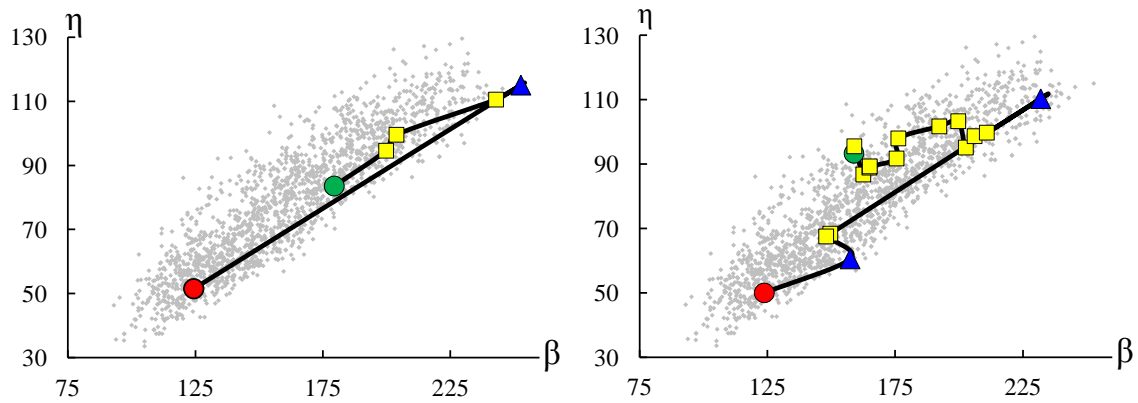

(a) Starting point 0, ending structure 194. (b) Starting point 4710, ending structure 249.

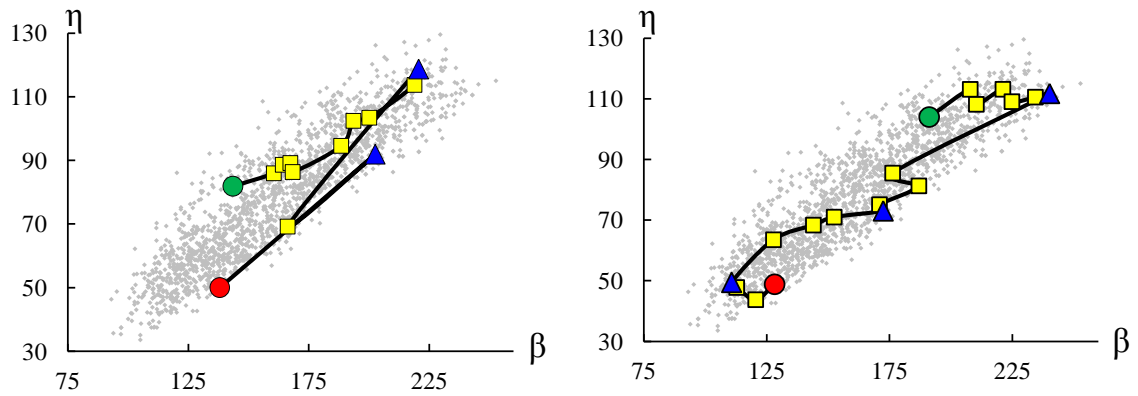

(c) Starting point 8389, ending structure 9004. (d) Starting point 41329, ending structure 9133.

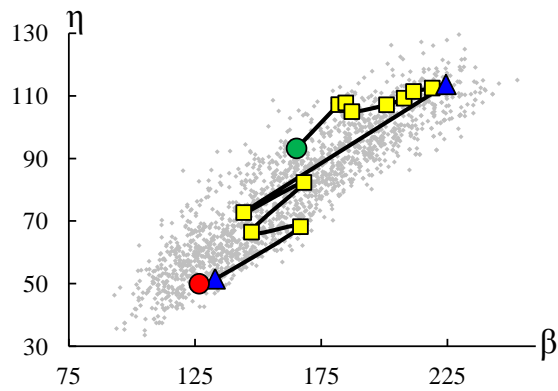

(e) Starting point 41668, ending structure 45034.

Figure 13: Paths resulting from GBGLS3' algorithm.

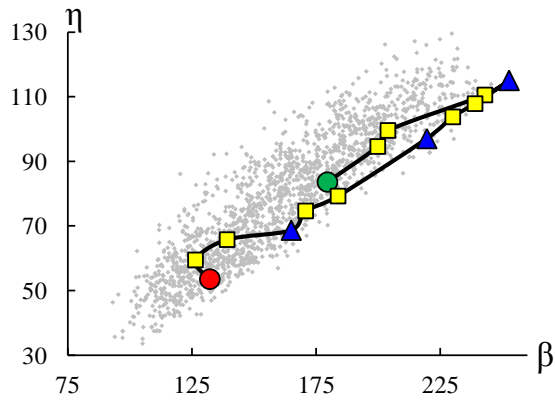

(a) Starting point 0, ending structure 183.

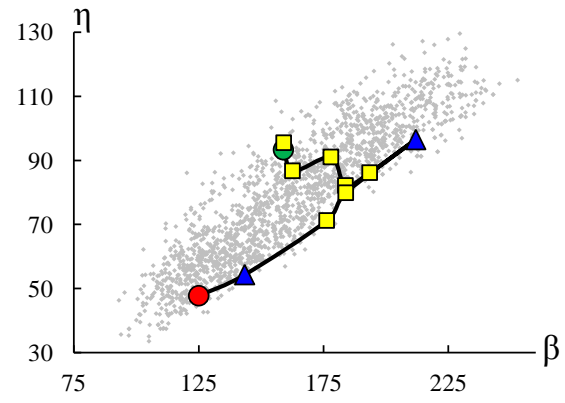

(b) Starting point 4710, ending structure 13037.

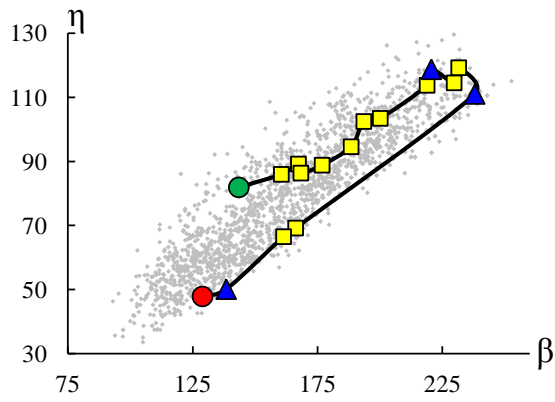

(c) Starting point 8389, ending structure 9080.

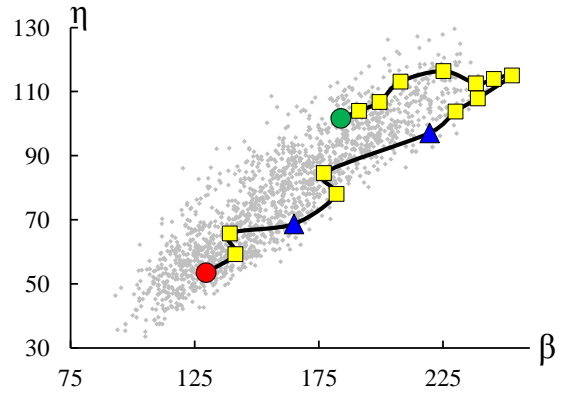

(d) Starting point 41329, ending structure 237.

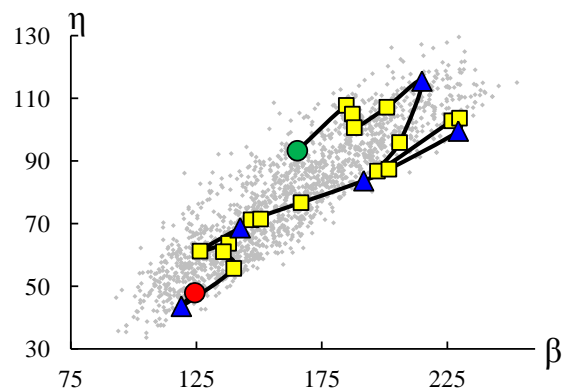

(e) Starting point 41668, ending structure 12974.

Figure 14: Paths resulting from BLS algorithm.



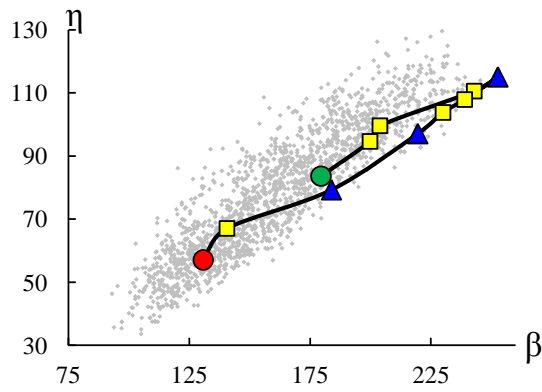

(a) Starting point 0, ending structure 131.

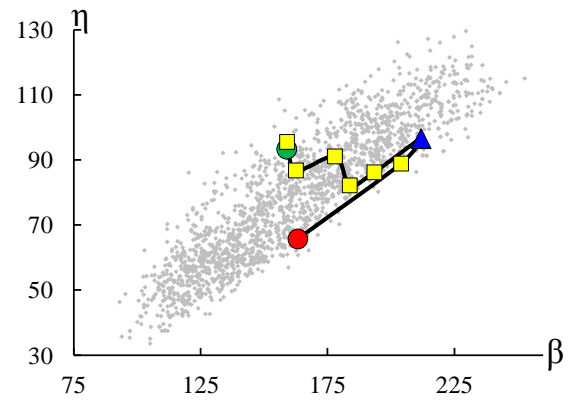

(b) Starting point 4710, ending structure 12821.

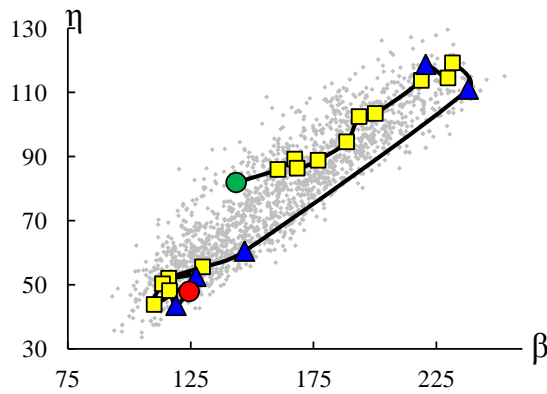

(c) Starting point 8389, ending structure 12974.

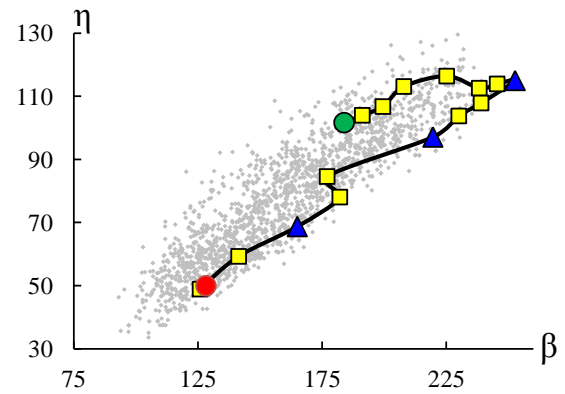

(d) Starting point 41329, ending structure 234.

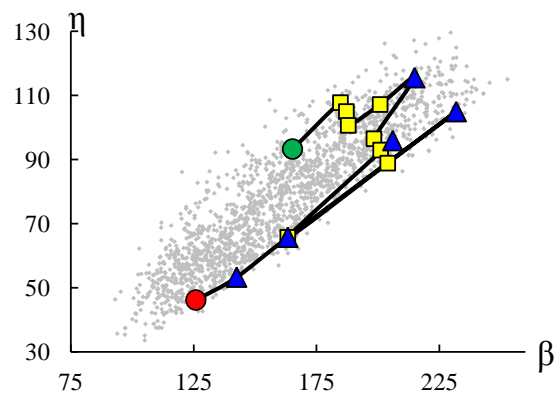

(e) Starting point 41668, ending structure 12985.

Figure 15: Paths resulting from BLSP algorithm.

## Lambda versus Lagrangian for all Algorithms

In this section,  $\lambda$  and Lagrangian comparison plots are given. To avoid repetition, a sampling of plots are given from each starting point including zero, 4710, 8389 and 41329. The plot for starting point 41668 is given in the main text. For clarity purposes, Lagrangian values given here have been scaled by the  $\Delta$  factor in the amount shown in each plot's legend. The symbols used within the plots are as follows, the black circles denote GBGLS1 algorithm, the blue triangles denote GBGLS4 and GBGLS2 algorithm and they are noted as such, the red triangles denote GBGLS3', the green squares denote GBGLS0, the light blue asterisks denote GBLS, the purple diamonds denote BLS algorithm, and the orange squares with black cross denote BLSP.

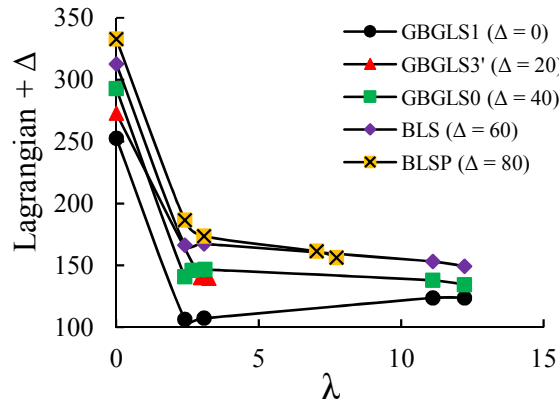

Figure 16: Lagrangian versus  $\lambda$  comparison for starting point zero.

The plot shown in 19 has an inset of  $\lambda$  versus Lagrangian for GBGLSX, where GBGLSX stands for algorithms GBGLS1 through GBGLS4. These particular algorithms were given as an inset due to the considerable difference in numerical value of  $\lambda$ .

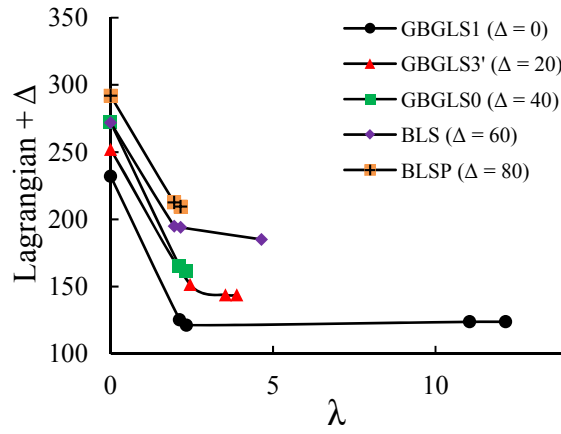

Figure 17: Lagrangian versus  $\lambda$  comparison for starting point 4710.

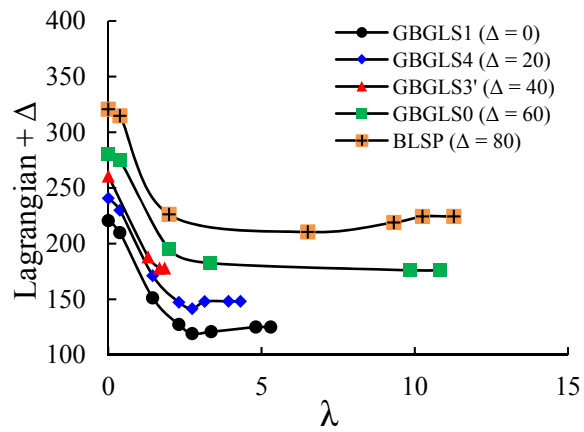

Figure 18: Lagrangian versus  $\lambda$  comparison for starting point 8389.

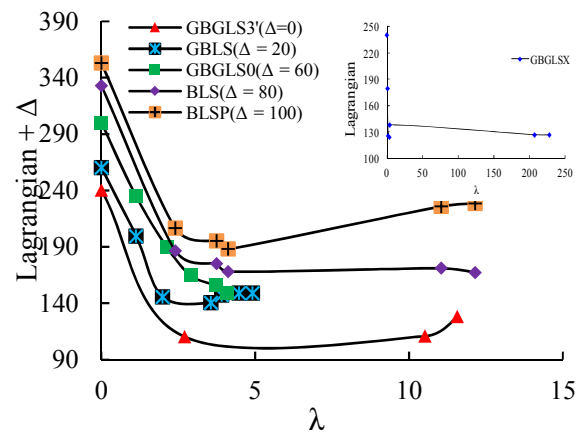

Figure 19: Lagrangian versus  $\lambda$  comparison for starting point 41329. Inset is plot of  $\lambda$  versus Lagrangian for GBGLSX=1-4.

# Property Data Associated with Each Algorithm

In 3 all data associated with each starting point is given. This includes, for each algorithm, the hyperpolarizability ( $\beta$ ), the penalty for the run ( $\pi$ ), the absorbance metric ( $\eta$ ), the total number of molecules computed, the final structure number, and the chemical graph for the final structure.

Table 3: Constrained property (hyperpolarizability ( $\beta$ ) given in units of  $10^{-30}\text{esu}^{-1}$ ), associated penalty ( $\pi$ ) given in nm, absorbance metric ( $\eta$ ), number of molecules computed (N. Mol.) and final structure for each algorithm studied. Five starting points have been examined.

| Method  | Start | $\beta$ | $\pi$ | $\eta$ | N. Mol. | Final | Chemical graph                                                                        |
|---------|-------|---------|-------|--------|---------|-------|---------------------------------------------------------------------------------------|
| GBLS    | 0     | 123.8   | 0     | 49.1   | 101     | 246   | 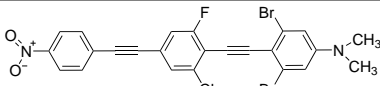  |
| GBGLS0  |       | 133.8   | 3.2   | 53.2   | 84      | 214   |  |
| GBGLS1  |       | 123.8   | 0     | 49.1   | 81      | 246   |  |
| GBGLS2  |       | 123.8   | 0     | 49.1   | 80      | 246   |  |
| GBGLS3  |       | 123.8   | 0     | 49.1   | 79      | 246   |  |
| GBGLS3' |       | 124.4   | 1.5   | 51.5   | 40      | 194   |  |
| GBGLS4  |       | 128.1   | 0     | 49.8   | 102     | 186   |  |
| BLS     |       | 132.1   | 3.5   | 53.5   | 69      | 183   |  |

*Continued on next page*

Table 3 – *Continued from previous page*

| Method  | Start | $\beta$ | $\pi$ | $\eta$ | N. Mol. | Final | Chemical graph |
|---------|-------|---------|-------|--------|---------|-------|----------------|
| BLSP    |       | 130.8   | 7.0   | 57.0   | 79      | 131   |                |
| GBLS    | 4710  | 123.8   | 0     | 49.1   | 98      | 249   |                |
| GBGLS0  |       | 164.9   | 18.7  | 68.7   | 55      | 85    |                |
| GBGLS1  |       | 123.8   | 0     | 49.1   | 84      | 249   |                |
| GBGLS2  |       | 123.8   | 0     | 49.1   | 84      | 249   |                |
| GBGLS3  |       | 123.8   | 0     | 49.1   | 84      | 249   |                |
| GBGLS3' |       | 123.8   | 0     | 49.1   | 67      | 249   |                |
| GBGLS4  |       | 123.8   | 0     | 49.1   | 84      | 249   |                |
| BLS     |       | 125.0   | 0     | 47.8   | 54      | 13037 |                |
| BLSP    |       | 163.3   | 15.7  | 65.7   | 48      | 12821 |                |
| GBLS    | 8389  | 128.9   | 0     | 47.9   | 119     | 9080  |                |
| GBGLS0  |       | 116.1   | 0     | 47.0   | 92      | 9182  |                |
| GBGLS1  |       | 125.0   | 0     | 47.8   | 124     | 13037 |                |

*Continued on next page*

Table 3 – Continued from previous page

| Method  | Start | $\beta$ | $\pi$ | $\eta$ | N. Mol. | Final | Chemical graph |
|---------|-------|---------|-------|--------|---------|-------|----------------|
| GBGLS2  |       | 125.0   | 0     | 47.8   | 124     | 13037 |                |
| GBGLS3  |       | 125.0   | 0     | 47.8   | 124     | 13037 |                |
| GBGLS3' |       | 138.0   | 0     | 49.5   | 60      | 9004  |                |
| GBGLS4  |       | 128.2   | 0     | 49.9   | 130     | 234   |                |
| BLS     |       | 128.9   | 0     | 47.9   | 64      | 9080  |                |
| BLSP    |       | 124.3   | 0     | 47.9   | 111     | 12974 |                |
| GBLS    | 41329 | 128.9   | 0     | 47.9   | 140     | 9080  |                |
| GBGLS0  |       | 164.9   | 18.7  | 68.7   | 86      | 85    |                |
| GBGLS1  |       | 126.9   | 0     | 42.6   | 113     | 9081  |                |
| GBGLS2  |       | 126.9   | 0     | 42.6   | 113     | 9081  |                |
| GBGLS3  |       | 126.9   | 0     | 42.6   | 113     | 9081  |                |
| GBGLS3' |       | 128.2   | 0     | 48.8   | 87      | 9133  |                |
| GBGLS4  |       | 126.9   | 0     | 42.6   | 113     | 9081  |                |

Continued on next page

Table 3 – *Continued from previous page*

| Method  | Start | $\beta$ | $\pi$ | $\eta$ | N. Mol. | Final | Chemical graph |
|---------|-------|---------|-------|--------|---------|-------|----------------|
| BLS     |       | 129.5   | 3.5   | 53.5   | 83      | 237   |                |
| BLSP    |       | 128.2   | 0     | 49.9   | 112     | 234   |                |
| GBLS    | 41668 | 125.0   | 0     | 47.8   | 103     | 13037 |                |
| GBGLS0  |       | 132.8   | 2.5   | 52.4   | 87      | 175   |                |
| GBGLS1  |       | 125.0   | 0     | 47.8   | 82      | 13037 |                |
| GBGLS2  |       | 132.8   | 0     | 46.9   | 109     | 12921 |                |
| GBGLS3  |       | 125.0   | 0     | 47.8   | 82      | 13037 |                |
| GBGLS3' |       | 126.6   | 0     | 48.0   | 61      | 45034 |                |
| GBGLS4  |       | 132.8   | 0     | 46.9   | 110     | 12921 |                |
| BLS     |       | 124.3   | 0     | 47.9   | 88      | 12974 |                |
| BLSP    |       | 125.8   | 0     | 46.1   | 109     | 12985 |                |

In 4 through 8 all data for final substitution statistics are given in terms of starting point. Each algorithm tested is given here and the data is organized by substitution site and the final substitutions are ranked in terms of highest probability, lowest probability and two



intermediates.

Table 4: Final substitution site statistics for GBGLS1-4 and GBGLS3', starting point zero.

| Algorithm | Site Number | High | Low | Intermediate(1) | Intermediate(2) |
|-----------|-------------|------|-----|-----------------|-----------------|
| GBGLS1    | 1           | Cl   | H   | Br              | F               |
|           | 2           | Cl   | H   | Br              | F               |
|           | 3           | Br   | H   | Cl              | F               |
|           | 4           | Br   | H   | Cl              | F               |
|           | 5           | Cl   | F   | Br              | H               |
|           | 6           | Cl   | H   | Br              | F               |
|           | 7           | Cl   | Br  | H               | F               |
|           | 8           | Cl   | F   | H               | Br              |
| GBGLS2    | 1           | Cl   | H   | Br              | F               |
|           | 2           | Cl   | H   | Br              | F               |
|           | 3           | Br   | H   | Cl              | F               |
|           | 4           | Br   | H   | Cl              | F               |
|           | 5           | Cl   | F   | Br              | H               |
|           | 6           | Cl   | H   | F               | Br              |
|           | 7           | Cl   | Br  | H               | F               |
|           | 8           | H    | Cl  | Br              | F               |
| GBGLS3    | 1           | Cl   | H   | Br              | F               |
|           | 2           | Cl   | H   | Br              | F               |
|           | 3           | Br   | H   | Cl              | F               |
|           | 4           | Br   | H   | Cl              | F               |
|           | 5           | Cl   | F   | Br              | H               |
|           | 6           | Cl   | H   | Br              | F               |
|           | 7           | Cl   | Br  | H               | F               |
|           | 8           | Cl   | F   | H               | Br              |
| GBGLS3'   | 1           | Cl   | H   | F               | Br              |
|           | 2           | F    | Br  | Cl              | H               |
|           | 3           | Cl   | H   | F               | Br              |
|           | 4           | Cl   | H   | Br              | F               |
|           | 5           | H    | Cl  | F               | Br              |
|           | 6           | H    | Cl  | F               | Br              |
|           | 7           | H    | Br  | F               | Cl              |
|           | 8           | H    | Cl  | F               | Br              |
| GBGLS4    | 1           | Br   | H   | Cl              | F               |
|           | 2           | Cl   | H   | Br              | F               |
|           | 3           | Br   | H   | Cl              | F               |
|           | 4           | Br   | H   | Cl              | F               |
|           | 5           | Cl   | Br  | H               | F               |
|           | 6           | H    | Cl  | Br              | F               |
|           | 7           | H    | Br  | F               | Cl              |
|           | 8           | H    | F   | Cl              | Br              |

Table 5: Final substitution site statistics for GBGLS1-4 and GBGLS3', starting point 4710.

| Algorithm | Site Number | High | Low | Intermediate(1) | Intermediate(2) |
|-----------|-------------|------|-----|-----------------|-----------------|
| GBGLS1    | 1           | F    | Br  | Cl              | H               |
|           | 2           | Cl   | H   | Br              | F               |
|           | 3           | Br   | H   | Cl              | F               |
|           | 4           | Br   | F   | Cl              | H               |
|           | 5           | H    | Cl  | Br              | F               |
|           | 6           | Cl   | F   | Br              | H               |
|           | 7           | H    | F   | Cl              | Br              |
|           | 8           | F    | H   | Cl              | Br              |
| GBGLS2    | 1           | F    | Br  | Cl              | H               |
|           | 2           | Cl   | H   | Br              | F               |
|           | 3           | Br   | H   | Cl              | F               |
|           | 4           | Br   | F   | Cl              | H               |
|           | 5           | H    | Cl  | Br              | F               |
|           | 6           | Br   | F   | Cl              | H               |
|           | 7           | H    | F   | Cl              | Br              |
|           | 8           | F    | H   | Cl              | Br              |
| GBGLS3    | 1           | F    | Br  | Cl              | H               |
|           | 2           | Cl   | H   | Br              | F               |
|           | 3           | Br   | H   | Cl              | F               |
|           | 4           | Br   | F   | Cl              | H               |
|           | 5           | H    | Cl  | Br              | F               |
|           | 6           | Cl   | F   | Br              | H               |
|           | 7           | H    | F   | Cl              | Br              |
|           | 8           | F    | H   | Cl              | Br              |
| GBGLS3'   | 1           | F    | H   | Cl              | Br              |
|           | 2           | Br   | F   | H               | Cl              |
|           | 3           | Br   | H   | F               | Cl              |
|           | 4           | Br   | H   | F               | Cl              |
|           | 5           | H    | Br  | Cl              | F               |
|           | 6           | Cl   | Br  | H               | F               |
|           | 7           | H    | Br  | Cl              | F               |
|           | 8           | H    | F   | Cl              | Br              |
| GBGLS4    | 1           | F    | Br  | Cl              | H               |
|           | 2           | Cl   | H   | Br              | F               |
|           | 3           | Br   | H   | Cl              | F               |
|           | 4           | Br   | F   | Cl              | H               |
|           | 5           | H    | Cl  | Br              | F               |
|           | 6           | Br   | F   | Cl              | H               |
|           | 7           | H    | F   | Cl              | Br              |
|           | 8           | F    | H   | Cl              | Br              |

Table 6: Final substitution site statistics for GBGLS1-4 and GBGLS3', starting point 8389.

| Algorithm | Site Number | High | Low | Intermediate (1) | Intermediate (2) |
|-----------|-------------|------|-----|------------------|------------------|
| GBGLS1    | 1           | Cl   | H   | F                | Br               |
|           | 2           | F    | H   | Br               | Cl               |
|           | 3           | Cl   | F   | Br               | H                |
|           | 4           | Cl   | H   | Br               | F                |
|           | 5           | Br   | F   | Cl               | H                |
|           | 6           | H    | F   | Cl               | Br               |
|           | 7           | F    | Cl  | H                | Br               |
|           | 8           | H    | F   | Cl               | Br               |
| GBGLS2    | 1           | Cl   | H   | F                | Br               |
|           | 2           | F    | H   | Br               | Cl               |
|           | 3           | Cl   | F   | Br               | H                |
|           | 4           | Cl   | H   | Br               | F                |
|           | 5           | Br   | F   | Cl               | H                |
|           | 6           | H    | Br  | Cl               | F                |
|           | 7           | F    | Cl  | H                | Br               |
|           | 8           | H    | F   | Cl               | Br               |
| GBGLS3    | 1           | Cl   | H   | F                | Br               |
|           | 2           | F    | H   | Br               | Cl               |
|           | 3           | Cl   | F   | Br               | H                |
|           | 4           | Cl   | H   | Br               | F                |
|           | 5           | Br   | F   | Cl               | H                |
|           | 6           | H    | F   | Cl               | Br               |
|           | 7           | F    | Cl  | H                | Br               |
|           | 8           | H    | F   | Cl               | Br               |
| GBGLS3'   | 1           | F    | Br  | Cl               | H                |
|           | 2           | H    | F   | Br               | Cl               |
|           | 3           | Cl   | H   | Br               | F                |
|           | 4           | F    | Br  | H                | Cl               |
|           | 5           | Cl   | F   | Br               | H                |
|           | 6           | H    | Cl  | F                | Br               |
|           | 7           | Cl   | H   | F                | Br               |
|           | 8           | F    | H   | Br               | Cl               |
| GBGLS4    | 1           | Cl   | Br  | F                | H                |
|           | 2           | Cl   | H   | F                | Br               |
|           | 3           | Cl   | F   | Br               | H                |
|           | 4           | Cl   | H   | F                | Br               |
|           | 5           | H    | F   | Cl               | Br               |
|           | 6           | Cl   | Br  | H                | F                |
|           | 7           | F    | Cl  | H                | Br               |
|           | 8           | H    | F   | Br               | Cl               |

Table 7: Final substitution site statistics for GBGLS1-4 and GBGLS3', starting point 41329.

| Algorithm | Site Number | High | Low | Intermediate(1) | Intermediate(2) |
|-----------|-------------|------|-----|-----------------|-----------------|
| GBGLS1    | 1           | Br   | H   | Cl              | F               |
|           | 2           | Cl   | H   | Br              | F               |
|           | 3           | Br   | H   | Cl              | F               |
|           | 4           | Br   | H   | Cl              | F               |
|           | 5           | Br   | F   | Cl              | H               |
|           | 6           | H    | F   | Br              | Cl              |
|           | 7           | Cl   | F   | H               | Br              |
|           | 8           | H    | F   | Br              | Cl              |
| GBGLS2    | 1           | Br   | H   | Cl              | F               |
|           | 2           | Cl   | H   | Br              | F               |
|           | 3           | Cl   | H   | Br              | F               |
|           | 4           | Cl   | H   | Br              | F               |
|           | 5           | Br   | F   | Cl              | H               |
|           | 6           | H    | Cl  | Br              | F               |
|           | 7           | Cl   | F   | H               | Br              |
|           | 8           | H    | F   | Br              | Cl              |
| GBGLS3    | 1           | Br   | H   | Cl              | F               |
|           | 2           | Cl   | H   | Br              | F               |
|           | 3           | Br   | H   | Cl              | F               |
|           | 4           | Br   | H   | Cl              | F               |
|           | 5           | Br   | F   | Cl              | H               |
|           | 6           | H    | F   | Br              | Cl              |
|           | 7           | Cl   | F   | H               | Br              |
|           | 8           | H    | F   | Br              | Cl              |
| GBGLS3'   | 1           | Cl   | H   | Br              | F               |
|           | 2           | Cl   | H   | Br              | F               |
|           | 3           | Cl   | H   | Br              | F               |
|           | 4           | Cl   | F   | Br              | H               |
|           | 5           | Cl   | F   | Br              | H               |
|           | 6           | H    | F   | Br              | Cl              |
|           | 7           | Cl   | F   | Br              | H               |
|           | 8           | H    | F   | Br              | Cl              |
| GBGLS4    | 1           | Br   | H   | Cl              | F               |
|           | 2           | Cl   | H   | Br              | F               |
|           | 3           | Br   | H   | Cl              | F               |
|           | 4           | Br   | H   | Cl              | F               |
|           | 5           | Br   | F   | Cl              | H               |
|           | 6           | H    | Cl  | Br              | F               |
|           | 7           | Cl   | F   | H               | Br              |
|           | 8           | H    | F   | Br              | Cl              |

Table 8: Final substitution site statistics for GBGLS1-4 and GBGLS3', starting point 41668.

| Algorithm | Site Number | High | Low | Intermediate(1) | Intermediate(2) |
|-----------|-------------|------|-----|-----------------|-----------------|
| GBGLS1    | 1           | F    | Br  | Cl              | H               |
|           | 2           | Br   | F   | Cl              | H               |
|           | 3           | Cl   | H   | Br              | F               |
|           | 4           | Cl   | H   | Br              | F               |
|           | 5           | Cl   | F   | H               | Br              |
|           | 6           | Cl   | Br  | H               | F               |
|           | 7           | F    | Cl  | Br              | H               |
|           | 8           | H    | Cl  | Br              | F               |
| GBGLS2    | 1           | F    | Br  | Cl              | H               |
|           | 2           | Cl   | Br  | F               | H               |
|           | 3           | Br   | F   | Cl              | H               |
|           | 4           | Cl   | Br  | F               | H               |
|           | 5           | Cl   | F   | Br              | H               |
|           | 6           | Br   | Cl  | H               | F               |
|           | 7           | Br   | F   | H               | Cl              |
|           | 8           | H    | Cl  | Br              | F               |
| GBGLS3    | 1           | F    | Br  | Cl              | H               |
|           | 2           | Br   | F   | Cl              | H               |
|           | 3           | Cl   | H   | Br              | F               |
|           | 4           | Cl   | H   | Br              | F               |
|           | 5           | Br   | F   | H               | Cl              |
|           | 6           | Cl   | Br  | H               | F               |
|           | 7           | F    | Cl  | Br              | H               |
|           | 8           | H    | Cl  | Br              | F               |
| GBGLS3'   | 1           | Cl   | H   | Br              | F               |
|           | 2           | Cl   | Br  | H               | F               |
|           | 3           | Cl   | H   | Br              | F               |
|           | 4           | Br   | H   | Cl              | F               |
|           | 5           | Br   | F   | H               | Cl              |
|           | 6           | Cl   | H   | Br              | F               |
|           | 7           | H    | Br  | Cl              | F               |
|           | 8           | H    | F   | Br              | Cl              |
| GBGLS4    | 1           | F    | Br  | Cl              | H               |
|           | 2           | Cl   | Br  | F               | H               |
|           | 3           | Br   | F   | Cl              | H               |
|           | 4           | Cl   | Br  | F               | H               |
|           | 5           | Cl   | F   | Br              | H               |
|           | 6           | Br   | Cl  | H               | F               |
|           | 7           | Br   | F   | H               | Cl              |
|           | 8           | H    | Cl  | Br              | F               |
